# Supplementary material
Source: publisher figshare collection journal article supplement (https://tandf.figshare.com/articles/dataset/_/8226623)
Supplement: Supplementary file 1 [file 1]

**Table 24S.** Minimum adequate models' parameters for log-transformed retinol and  $\alpha$ -tocopherol concentrations obtained after backward selection of variables (time, treatment and their interaction) of the respective maximal linear models. Slope estimates,  $t$  and  $p$  values at the cross between groups (experimental and control groups) and times (1 - July 08, 2016; 2 - July 13, 2016; 3 - July 21, 2016; 4 - July 27, 2016; 5 - August 09, 2016) refer to interaction terms (treatment : time).

|                      | Time | Experimental group |        |                       | Control group  |        |                       | Std. Error | Intercept estimate     | Adj. $R^2$ | $F$   | $p$                    |
|----------------------|------|--------------------|--------|-----------------------|----------------|--------|-----------------------|------------|------------------------|------------|-------|------------------------|
|                      |      | Slope estimate     | $t$    | $p$                   | Slope estimate | $t$    | $P$                   |            |                        |            |       |                        |
| Retinol              | 1    | -0.3250            | -5.693 | $7.90 \cdot 10^{-8}$  | -0.3324        | -5.823 | $4.29 \cdot 10^{-8}$  | 0.0571     | 0.0082 <sup>n.s.</sup> | 0.3855     | 10.69 | $2.67 \cdot 10^{-12}$  |
|                      | 2    | -0.0686            | -1.201 | 0.2318                | -0.3438        | -6.021 | $1.66 \cdot 10^{-8}$  |            |                        |            |       |                        |
|                      | 3    | -0.1094            | -1.917 | 0.0575                | -0.2907        | -5.092 | $1.21 \cdot 10^{-6}$  |            |                        |            |       |                        |
|                      | 4    | -0.0904            | -1.583 | 0.1157                | -0.2865        | -5.019 | $1.67 \cdot 10^{-6}$  |            |                        |            |       |                        |
|                      | 5    | NA                 | NA     | NA                    | -0.3106        | -5.441 | $2.54 \cdot 10^{-7}$  |            |                        |            |       |                        |
| $\alpha$ -tocopherol | 1    | -0.5791            | -7.581 | $5.75 \cdot 10^{-12}$ | -0.5817        | -7.615 | $4.80 \cdot 10^{-12}$ | 0.0764     | 1.0767 <sup>***</sup>  | 0.6063     | 24.78 | $< 2.2 \cdot 10^{-16}$ |
|                      | 2    | -0.0043            | -0.057 | 0.955                 | -0.5652        | -7.398 | $1.52 \cdot 10^{-11}$ |            |                        |            |       |                        |
|                      | 3    | -0.0025            | -0.032 | 0.974                 | -0.4295        | -5.622 | $1.10 \cdot 10^{-7}$  |            |                        |            |       |                        |
|                      | 4    | 0.0161             | 0.211  | 0.833                 | -0.4486        | -5.872 | $3.39 \cdot 10^{-8}$  |            |                        |            |       |                        |
|                      | 5    | NA                 | NA     | NA                    | -0.4363        | -5.711 | $7.26 \cdot 10^{-8}$  |            |                        |            |       |                        |
