# Supplementary material
Source: publisher figshare collection journal article supplement (https://tandf.figshare.com/articles/dataset/_/8226623)
Supplement: Supplementary file 2 [file 1]

**Table 1S.** Chemical composition of the feed supplementation (%).

| Items                                 | Total Feed |
|---------------------------------------|------------|
| Dry matter                            | 88.5       |
| Crude protein                         | 10         |
| Lysine                                | 0.3        |
| Methionine                            | 0.16       |
| Tryptophan                            | 0.09       |
| Fat                                   | 3.0        |
| Crude fibre                           | 3.7        |
| Ash                                   | 1.8        |
| Ca                                    | 0.03       |
| P                                     | 0.31       |
| Starch                                | 57.5       |
| Free sugars                           | 2.1        |
| NDF (% DM)                            | 12.5       |
| Lignins                               | 1.3        |
| UFL (energy)                          | 1.05       |
| Fatty acids (%)                       |            |
| C14:0 myristic acid                   | 0.010      |
| C16:0 palmitic acid                   | 0.326      |
| C16:1 palmitoleic acid                | 0.006      |
| C18:0 stearic acid                    | 0.038      |
| C18:1 oleic acid                      | 0.442      |
| C18:2 linoleic acid                   | 1.214      |
| C18:3 linolenic acid                  | 0.063      |
| Vitamins                              |            |
| vitamin E ( $\alpha$ -tochoferol) (%) | 1.809      |
| vitamin A (retinol) ( $\mu$ g/100g)   | 66.738     |
